# Respiratory Symptoms and Airway Obstruction in HIV-Infected Subjects in the HAART Era

M. Patricia George<sup>1</sup>, Mouhamed Kannass<sup>2</sup>, Laurence Huang<sup>3</sup>, Frank C. Scirba<sup>1</sup>, Alison Morris<sup>1,2\*</sup>

**1** Department of Medicine, University of Pittsburgh School of Medicine, Pittsburgh, Pennsylvania, United States of America, **2** Department of Medicine, Division of Pulmonary and Critical Care Medicine, University of Southern California and Will Rogers Pulmonary Research Institute, Los Angeles, California, United States of America, **3** Department of Medicine, San Francisco General Hospital, University of California San Francisco, San Francisco, California, United States of America

## Abstract

**Background:** Prevalence and risk factors for respiratory symptoms and airway obstruction in HIV-infected subjects in the era of highly active antiretroviral therapy (HAART) are unknown. We evaluated respiratory symptoms and measured airway obstruction to identify the impact of HAART and other risk factors on respiratory symptoms and pulmonary function.

**Methodology/Principal Findings:** Two hundred thirty-four HIV-infected adults without acute respiratory symptoms were recruited from an HIV clinic. All subjects were interviewed and performed spirometry. Multivariate linear and logistic regressions were performed to determine predictors of respiratory symptoms, forced expiratory volume in one second (FEV<sub>1</sub>) percent predicted, and FEV<sub>1</sub>/forced vital capacity (FEV<sub>1</sub>/FVC). Thirty-one percent of subjects reported at least one respiratory symptom. Smoking status (current or former versus never) (odds ratio [OR]=2.7, 95% confidence interval [CI]=1.41–5.22, p=0.003), higher log plasma HIV viral levels (OR=1.12, 95%CI=1.02–1.24, p=0.02), and lower FEV<sub>1</sub>/FVC (OR=1.06 for every 0.01 decrease in FEV<sub>1</sub>/FVC, 95%CI=1.02–1.14, p=0.001) were independent predictors of respiratory symptoms. Age (p=0.04), pack-year smoking history (p<0.001), previous bacterial pneumonia (p=0.007), and HAART use (p=0.04) were independent predictors of decreased FEV<sub>1</sub>/FVC.

**Conclusions/Significance:** Respiratory symptoms remain common in HIV-infected subjects, especially in those with a smoking history. Subjects who were older, had a greater pack-year history of smoking, or previous bacterial pneumonia had lower FEV<sub>1</sub>/FVC ratios. Interestingly, use of HAART was independently associated with a decreased FEV<sub>1</sub>/FVC, possibly secondary to an immune response to subclinical infections, increased autoimmunity, or other factors associated with HAART use.

**Citation:** George MP, Kannass M, Huang L, Scirba FC, Morris A (2009) Respiratory Symptoms and Airway Obstruction in HIV-Infected Subjects in the HAART Era. PLoS ONE 4(7): e6328. doi:10.1371/journal.pone.0006328

**Editor:** Nitika Pant Pai, McGill University Health Center, Montreal Chest Institute, Canada

**Received:** March 4, 2009; **Accepted:** June 18, 2009; **Published:** July 21, 2009

**Copyright:** © 2009 George et al. This is an open-access article distributed under the terms of the Creative Commons Attribution License, which permits unrestricted use, distribution, and reproduction in any medium, provided the original author and source are credited.

**Funding:** This work was supported by NIH grants: NIH HL072837 (AM), HL087713 (LH), HL090335 (LH), P50 HL084948 (FS), and the Campbell Foundation (AM). In addition, this publication was made possible by Grant Number UL1 RR024153 from the National Center for Research Resources (NCRR), a component of the National Institutes of Health (NIH), and NIH Roadmap for Medical Research. Information on NCRR is available at <http://www.ncrr.nih.gov/>. Information on Re-engineering the Clinical Research Enterprise can be obtained from <http://nihroadmap.nih.gov/clinicalresearch/overview-translational.asp>. The funders had no role in study design, data collection and analysis, decision to publish, or preparation of the manuscript.

**Competing Interests:** The authors have declared that no competing interests exist.

\* E-mail: [morrison@upmc.edu](mailto:morrisa@upmc.edu)

## Introduction

The development of highly active antiretroviral therapy (HAART) has led to impressive declines in morbidity and mortality from the human immunodeficiency virus (HIV) [1]. With decreases in opportunistic infections and malignancies, a new constellation of conditions has emerged that have been linked to antiretroviral medications or to extended periods of time living with HIV. In particular, conditions such as cardiovascular disease, dyslipidemia, insulin resistance, and osteoporosis seem to be accelerated in HIV-infected persons receiving HAART [2,3]. Immune reconstitution inflammatory syndrome (IRIS) has also been reported in HIV-infected persons initiating HAART who develop inflammatory reactions to either known or occult pathogens, and autoimmune disease has been seen during immune restoration [4,5].

In the pre-HAART era, HIV-infected persons had a high prevalence of respiratory complaints including cough, shortness of

breath, and dyspnea on exertion [6], and HIV infection had been associated with accelerated development of emphysema, airway obstruction, and reduced diffusing capacity for carbon monoxide [7,8]. Respiratory complaints occurred even in individuals without a history of AIDS or pulmonary infections. Although one study examined chronic obstructive pulmonary disease (COPD) as documented by self-report and ICD-9 diagnoses in HIV-infected patients in the HAART era, no studies have measured airway obstruction directly [9]. Therefore, the impact of HAART on frequency of respiratory symptoms or airway obstruction is unknown.

Risk factors for respiratory symptoms and airway obstruction reported in the pre-HAART era might also have changed with HAART. Most previous studies documented an association between smoking, respiratory symptoms, and airway obstruction among HIV-infected individuals [6,10]. Other pre-HAART era risk factors for respiratory symptoms included intravenous drug

use (IDU), low CD4 cell count, and previous pneumonia [6]. Pre-HAART risk factors for airway obstruction included IDU, previous *Pneumocystis* pneumonia (PCP), and previous bacterial pneumonia [8,11]. It is important to determine current risk factors for respiratory complaints and airflow obstruction in order to identify and treat affected patients.

We conducted a cross-sectional study of HIV-infected individuals presenting to an HIV clinic for routine care. Our overall aims were to investigate the frequency of respiratory symptoms and airway obstruction during the HAART era, identify risk factors, and explore the relationship of HAART to symptoms and airway obstruction. We report the first prospective study to directly measure pulmonary function in HIV-infected individuals in the HAART era, and the first to report a relationship of HAART and airway obstruction.

## Methods

### Objectives

Our objectives were to determine frequency of respiratory symptoms and airway obstruction during the HAART era, to identify associated risk factors, and to determine the relationship of HAART to symptoms and pulmonary function.

### Participants

Subjects were HIV-infected adult outpatients at the University of Southern California HIV clinic, who were enrolled between September 2003 and September 2004. Subjects who had new or increasing cough, shortness of breath, or fever in the past four weeks were excluded, as were subjects with self-reported asthma.

### Description of Investigations Undertaken

**Data collection.** Data were collected by subject interview and standardized medical record abstraction using pre-determined definitions. Information collected from subjects included age, gender, race and ethnicity, HIV risk factor, medication use, smoking history, and history of an AIDS-defining diagnosis. History of pneumonia was obtained from both patient interview and chart review. HAART was defined as use of at least three medications from two classes of antiretroviral drugs within the previous 3 months as determined by medical record review. Current smokers were defined as those smoking at least one cigarette each day and at least a lifetime total of 100 cigarettes. Former smokers had quit for greater than one year. Subjects were asked about presence or absence of chronic respiratory symptoms including cough, shortness of breath, and dyspnea on exertion. Laboratory values for CD4 cell counts and plasma HIV viral levels were obtained within six months of spirometry testing.

**Spirometry.** All subjects performed spirometry according to American Thoracic Society guidelines [12]. Predicted values were calculated using published reference values [13].

### Ethics

The University of Southern California Institutional Review Board approved the study. All subjects gave written informed consent.

### Statistical Methods

**Statistical analysis.** Data were double-entered to ensure accuracy. Stata 8 (Stata Corporation, College Park, TX) was used for analysis, and significance determined for a  $p$ -value  $\leq 0.05$ . Variables were described using either  $t$ -tests and Wilcoxon rank-sum, or chi-square and Fisher's exact.

Percentage of subjects reporting respiratory symptoms was determined for individual symptoms and for any symptom. Univariate analyses were performed to determine clinical variables related to reporting any respiratory symptom. Step-wise forward and backward multivariate logistic regression was performed to determine independent predictors of respiratory symptoms by including variables significant at a level of  $p \leq 0.1$  in univariate analyses. If two variables were significantly correlated (i.e., smoking status and pack-year history), the variable with the strongest univariate relationship to the outcome was included. Interactions of variables were explored. Model fit was assessed using the Hosmer-Lemeshow goodness-of-fit test [14].

Forced expiratory volume in one second (FEV<sub>1</sub>) percent predicted, forced vital capacity (FVC) percent predicted, and FEV<sub>1</sub>/FVC were described for the entire cohort. The percentages of subjects with airway obstruction as determined both by FEV<sub>1</sub>/FVC below the 5% lower limit of normal adjusted for age and FEV<sub>1</sub>/FVC less than 0.70 were calculated [12]. Subjects with airway obstruction were also categorized according to the Global Initiative on Chronic Obstructive Lung Disease (GOLD) staging [15]. Univariate analyses were performed to determine variables associated with FEV<sub>1</sub> percent predicted and FEV<sub>1</sub>/FVC. Stepwise forward and backward multivariate linear regression was performed to determine independent predictors of FEV<sub>1</sub>/FVC by including variables at a level of  $p \leq 0.1$  in univariate analyses. The strongest univariate predictor was included in the multivariate model if two variables were significantly correlated. CD4 cell counts and plasma HIV viral levels were missing for 13 subjects. We compared models with and without subjects with missing data, and there were no significant differences. Data on HAART use were missing or incomplete (i.e. subjects reported recent use of fewer than 3 medications) in 19 subjects. Models were run without subjects who lacked adequate information on HAART use. For subjects reporting use of less than three antiretrovirals, we ran models including them in the HAART group and excluding them as well. There were no significant differences between these two models and because we felt the data were less reliable in the subjects reporting non-standard ART regimens, we chose to exclude them in the final model. We explored interactions between model variables. Because we were specifically interested in the relationship of HAART to FEV<sub>1</sub>/FVC, we investigated other potential interactions and modifying effects for relationship of HAART use to FEV<sub>1</sub>/FVC. To account for confounding, we explored potential mediators and moderators, such as plasma HIV viral levels, CD4 cell counts, and smoking history, using linear regression as described [16]. Normality of model residuals was assessed.

## Results

### Clinical characteristics

Two hundred and thirty-four subjects participated. The majority (82.5%) were men (Table 1). Subjects ranged in age from 26 years to 70 years, with a mean age of 44.1 years. There was a high prevalence of smoking as 59.8% were either current or former smokers. Among smokers, the median number of pack-years was 10. The median CD4 cell count in the cohort was 371 cells/ $\mu$ l and the majority (83.3%) of subjects were receiving HAART. HAART users were more likely to be male (odds ratio [OR] = 4.16, 95% confidence interval [CI] = 1.56–11.11,  $p = 0.007$ ) and less likely to be current or former smokers (OR = 0.32, 95%CI = 0.08–0.92,  $p = 0.004$ ) (Table 2). Subjects on HAART had lower log plasma HIV viral levels (6.4 copies/ml vs. 8.0 copies/ml,  $p = 0.02$ ), but lower CD4 cell counts (333 cells/ $\mu$ l vs. 554 cells/ $\mu$ l,

**Table 1.** Characteristics of HIV-infected subjects according to respiratory symptoms.

| Characteristic                                  | Entire cohort<br>n = 234 | No symptoms<br>n = 161 | Symptoms<br>n = 73 | P      | OR (95% CI)                    |
|-------------------------------------------------|--------------------------|------------------------|--------------------|--------|--------------------------------|
| Age, mean years (SD)                            | 44.1 (9.4)               | 43.1 (9.9)             | 46.4 (8.0)         | 0.002  | 1.04 (1.01–1.07) <sup>†</sup>  |
| Gender                                          |                          |                        |                    |        |                                |
| Male, n (%)                                     | 193 (82.5)               | 134 (83.2)             | 59 (80.8)          | 0.65   |                                |
| Female, n (%)                                   | 41 (17.5)                | 27 (16.8)              | 14 (19.2)          |        |                                |
| Race/ethnicity                                  |                          |                        |                    |        |                                |
| White, n (%)                                    | 32 (13.7)                | 18 (11.2)              | 14 (19.2)          | 0.40   |                                |
| African-American, n (%)                         | 66 (28.2)                | 43 (26.7)              | 23 (31.5)          |        |                                |
| Hispanic, n (%)                                 | 124 (53.0)               | 92 (57.1)              | 32 (43.8)          |        |                                |
| Other, n (%)                                    | 12 (5.1)                 | 8 (5.0)                | 4 (5.5)            |        |                                |
| HIV risk factor (n = 223)                       |                          |                        |                    |        |                                |
| MSM, n (%)                                      | 107 (48.0)               | 74 (49.0)              | 33 (45.8)          | 0.93   |                                |
| IDU, n (%)                                      | 27 (12.1)                | 14 (9.3)               | 13 (18.1)          | 0.04   | 2.30 (1.01–5.13)               |
| Heterosexual, n (%)                             | 89 (39.9)                | 63 (41.7)              | 26 (36.1)          | 0.61   |                                |
| Smoking history <sup>‡</sup>                    |                          |                        |                    |        |                                |
| Current, n (%)                                  | 87 (37.1)                | 51 (31.7)              | 36 (49.3)          | 0.0003 | 3.45 (1.64–7.14)               |
| Former, n (%)                                   | 53 (22.6)                | 32 (19.9)              | 21 (28.8)          | <0.001 | 4.76 (2.13–10.00)              |
| Never, n (%)                                    | 94 (40.2)                | 78 (48.4)              | 16 (21.9)          |        |                                |
| Pack-year history, median years, (range)        | 1.1 (0–90)               | 0.5 (0–90)             | 4.5 (0–60)         | 0.04   | 1.02 (1.001–1.05) <sup>†</sup> |
| CD4 cell count, median cells/ $\mu$ l (range)   | 371 (3–1368)             | 380 (14–1010)          | 313 (3–1368)       | 0.86   |                                |
| Log plasma HIV viral level, mean copies/ml (SD) | 6.5 (2.8)                | 6.2 (2.7)              | 7.2 (3.1)          | 0.02   | 1.12 (1.02–1.24)               |
| History of AIDS, n (%)                          | 150 (64.1)               | 102 (63.4)             | 48 (65.8)          | 0.72   |                                |
| Use of HAART, n (%)                             | 195 (83.3)               | 133 (82.6)             | 62 (84.9)          | 0.86   |                                |
| History of PCP, n (%)                           | 37 (15.8)                | 25 (15.5)              | 12 (16.4)          | 0.86   |                                |
| History of BP, n (%)                            | 64 (27.4)                | 37 (23.0)              | 27 (37.0)          | 0.02   | 2.01 (1.10–3.67)               |
| Hepatitis C, n (%)                              | 29 (12.4)                | 16 (9.9)               | 13 (17.8)          | 0.09   |                                |
| FEV <sub>1</sub> percent predicted, mean (SD)   | 99.1 (15.7)              | 100.0 (15.2)           | 96.9 (16.6)        | 0.15   |                                |
| FEV <sub>1</sub> /FVC, mean (SD)                | 0.82 (0.07)              | 0.81 (0.07)            | 0.78 (0.07)        | 0.001  | 1.06 (1.02–1.14) <sup>†</sup>  |

Note: BP = bacterial pneumonia; CI = confidence interval; HAART = highly active antiretroviral therapy; IDU = intravenous drug use; MSM = men who have sex with men; OR = odds ratio; PCP = *Pneumocystis pneumonia*; SD = standard deviation.

<sup>†</sup>per year.

<sup>‡</sup>per 0.01 decrease.

<sup>†</sup>Odds ratio as compared to never smokers.

doi:10.1371/journal.pone.0006328.t001

$p = 0.002$ ). There was no significant difference in time HIV-infected between HAART users and those not using HAART (8 years vs. 10 years,  $p = 0.6$ ).

### Respiratory symptoms

Prevalence of any respiratory symptom was 31.5%. Cough was most frequently reported, occurring in 23.0% of subjects. Sixteen percent of subjects reported dyspnea on exertion and 3.0% complained of shortness of breath at rest. Current or former smokers were more symptomatic than never smokers (Figure 1).

Age, intravenous drug use, smoking history, higher log plasma HIV viral levels and a history of bacterial pneumonia were associated with a higher likelihood of reporting respiratory symptoms (Table 1). There were no differences in FEV<sub>1</sub> percent predicted of those with and without symptoms, but FEV<sub>1</sub>/FVC was significantly lower among symptomatic subjects. Multivariate analysis demonstrated that current or former smoking status (OR = 2.7, 95% CI = 1.41–5.22,  $p = 0.003$ ), higher log serum HIV viral levels (OR = 1.12, 95% CI = 1.02–1.24,  $p = 0.02$ ), and lower

FEV<sub>1</sub>/FVC (OR = 1.06, 95% CI = 1.02–1.14,  $p = 0.001$ ) were independent predictors of respiratory symptoms.

### Spirometry

Most subjects (93.2%) had normal spirometry. Mean FEV<sub>1</sub> was 99.1 percent of predicted. Mean FVC was 94.0 percent of predicted, and mean FEV<sub>1</sub>/FVC was 0.82. The prevalence of clinical obstruction as determined by the 5% lower limit of age-adjusted normal was 8.6% and by the FEV<sub>1</sub>/FVC below 0.70 was 6.8%. Of these subjects, 62.5% were classified as GOLD stage I, and 37.5% were GOLD stage II.

No characteristics were significantly associated with FEV<sub>1</sub> including age, gender, race/ethnicity, HIV risk factor, smoking or pack-year history, CD4 cell count or HIV viral level, use of HAART, or history of pneumonia. In contrast, several clinical characteristics were associated with a lower FEV<sub>1</sub>/FVC (Table 3). The ratio decreased with increasing age ( $p < 0.001$ ) and those who were Hispanic had a higher FEV<sub>1</sub>/FVC than other racial groups (0.81 versus 0.79,  $p = 0.01$ ). Subjects who were current or former

**Table 2.** Characteristics of HIV-infected subjects according to use of HAART.

| Characteristic                                  | HAART (n = 195) | Non-HAART (n = 20) | P      |
|-------------------------------------------------|-----------------|--------------------|--------|
| Age, mean years (SD)                            | 44.4 (9.3)      | 42.0 (11.0)        | 0.28   |
| Gender                                          |                 |                    |        |
| Male, n (%)                                     | 168 (86.2)      | 12 (60.0)          | 0.007  |
| Female, n (%)                                   | 27 (13.9)       | 8 (40.0)           |        |
| Race/ethnicity                                  |                 |                    |        |
| White, n (%)                                    | 28 (14.4)       | 3 (15.0)           | 0.03   |
| African-American, n (%)                         | 54 (27.7)       | 11 (55.0)          |        |
| Hispanic, n (%)                                 | 106 (54.4)      | 5 (25.0)           |        |
| Other, n (%)                                    | 7 (3.6)         | 1 (5.0)            |        |
| HIV risk factor (n = 187)                       |                 |                    |        |
| MSM, n (%)                                      | 74 (44.3)       | 6 (30.0)           | 0.77   |
| IDU, n (%)                                      | 22 (13.2)       | 3 (15.0)           |        |
| Heterosexual, n (%)                             | 71 (42.5)       | 11 (55.0)          |        |
| Smoking history                                 |                 |                    |        |
| Current, n (%)                                  | 65 (33.3)       | 14 (70.0)          | 0.004  |
| Former, n (%)                                   | 45 (2.3)        | 2 (10.0)           |        |
| Never, n (%)                                    | 85 (43.6)       | 4 (20.0)           |        |
| Pack-year history, median years (range)         | 0.55 (0–90)     | 10 (0–37)          | 0.04   |
| CD4 cell count, median cells/ $\mu$ L (range)   | 333 (3–1076)    | 554 (124–1368)     | 0.002  |
| Log plasma HIV viral level, mean copies/mL (SD) | 6.4 (2.9)       | 8.0 (2.6)          | 0.02   |
| History of AIDS, n (%)                          | 137 (70.2)      | 2 (10.0)           | <0.001 |
| History of PCP, n (%)                           | 29 (14.9)       | 1 (5.0)            | 0.32   |
| History of BP, n (%)                            | 53 (27.2)       | 8 (40.0)           | 0.30   |
| Hepatitis C, n (%)                              | 23 (11.8)       | 4 (20.0)           | 0.29   |
| Time HIV-infected, median years (range)         | 8 (1–24)        | 10 (1–21)          | 0.60   |

Note: BP = bacterial pneumonia; CI = confidence interval; HAART = highly active antiretroviral therapy; IDU = intravenous drug use; MSM = men who have sex with men; OR = odds ratio; PCP = *Pneumocystis* pneumonia; SD = standard deviation.

doi:10.1371/journal.pone.0006328.t002

smokers had a lower FEV<sub>1</sub>/FVC than never smokers (0.79 versus 0.82,  $p = 0.01$ ) and FEV<sub>1</sub>/FVC decreased with increasing pack-year history ( $p < 0.001$ ). Subjects with a history of hepatitis C had a lower ratio than those who did not (0.77 versus 0.81,  $p = 0.02$ ), as

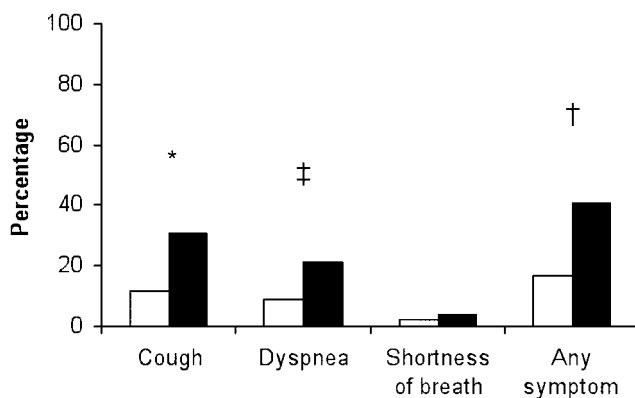

**Figure 1. Prevalence of respiratory symptoms in HIV-infected subjects according to smoking history.** Current/former smokers shown in black, never smokers in white. Dyspnea=dyspnea on exertion, shortness of breath=shortness of breath at rest. \* $p = 0.001$ ; ‡ $p = 0.01$ ; † $p < 0.001$ .

doi:10.1371/journal.pone.0006328.g001

did those who reported a history of bacterial pneumonia (0.78 versus 0.81,  $p = 0.001$ ). There was a trend for subjects receiving HAART to have a lower FEV<sub>1</sub>/FVC (0.80 versus 0.83,  $p = 0.09$ ). Multivariate modeling demonstrated that older age ( $p = 0.04$ ), pack-year history of smoking ( $p < 0.001$ ), and history of bacterial pneumonia ( $p = 0.007$ ) were independent predictors of lower FEV<sub>1</sub>/FVC (Table 3). Use of HAART was also an independent predictor of a lower FEV<sub>1</sub>/FVC ( $p = 0.04$ ). There were no significant interactions among variables in the model and no significant mediators or modifiers responsible for the effect of HAART. Sixteen subjects (8.2%) receiving HAART met clinical criteria for airway obstruction (FEV<sub>1</sub>/FVC < 0.70), but none of the subjects not receiving HAART had clinical obstruction ( $p = 0.37$ ). There were no relationships of FEV<sub>1</sub>/FVC to particular classes of antiretroviral therapy, although we were unable to assess nucleoside reverse transcriptase inhibitors (NRTI) separately from HAART as virtually all subjects receiving HAART were using an NRTI.

## Discussion

This study is the first to prospectively examine respiratory symptoms and directly measure spirometry in the HIV-infected population in the era of HAART. It is also the first study to report an association between HAART use and airway obstruction. Respiratory symptoms remain common in the current era and are

**Table 3.** Predictors of airway obstruction in HIV-infected subjects.

| Univariate predictors                         | Coefficient | P      |
|-----------------------------------------------|-------------|--------|
| Age                                           | -0.18       | <0.001 |
| Hispanic ethnicity (versus non-Hispanic)      | 2.3         | 0.01   |
| Smoking history (former/current versus never) | -2.2        | 0.01   |
| Smoking pack-year history                     | -0.19       | <0.001 |
| Hepatitis C                                   | -3.2        | 0.02   |
| History of bacterial pneumonia                | -3.2        | 0.001  |
| Use of HAART                                  | -2.8        | 0.09   |
| Multivariate predictors                       |             |        |
| Age                                           | -0.10       | 0.04   |
| Smoking pack-year history                     | -0.15       | <0.001 |
| History of bacterial pneumonia                | -2.8        | 0.007  |
| Use of HAART                                  | -3.2        | 0.04   |

Note: HAART = highly active antiretroviral therapy.  
doi:10.1371/journal.pone.0006328.t003

associated with age, smoking history, lower FEV<sub>1</sub>/FVC, and higher HIV viral levels. We found that a lower FEV<sub>1</sub>/FVC ratio is independently related to age, pack-year smoking history, and history of bacterial pneumonia. Interestingly, we also discovered an independent relationship of HAART use with lower FEV<sub>1</sub>/FVC.

Previous studies documented a high prevalence of respiratory symptoms in the pre-HAART era [6,17]. Diaz found that approximately 42% of 327 HIV-infected individuals reported dyspnea and 40% reported cough [6]. In the current cohort, only 16% complained of dyspnea and 23% of cough. Overall, about one-third of our subjects had respiratory symptoms. Although it is difficult to compare cohorts, respiratory symptoms may be somewhat less prevalent than previous, although still fairly common. Risk factors for respiratory symptoms were similar in both studies. Diaz reported that cigarette smoking, IDU, low CD4 cell count, and previous history of pneumonia were associated with increased respiratory symptoms. Similarly, we found that smoking was the strongest predictor of respiratory symptoms and that age, IDU, and history of bacterial pneumonia were associated with increased respiratory symptoms. We did not find that CD4 cell count was associated with respiratory symptoms, but high plasma HIV viral levels were. Also, subjects with respiratory symptoms had lower FEV<sub>1</sub>/FVC values than those not reporting symptoms, suggesting that symptoms might be the result of airway obstruction. Combined, these studies argue for increased efforts at smoking cessation, substance abuse intervention, and routine influenza and pneumococcal vaccinations in an effort to decrease respiratory symptoms in HIV-infected patients.

Many studies from the pre-HAART era demonstrated that HIV is associated with airway obstruction, emphysema, and decreased diffusing capacity for carbon monoxide [7,8,11,18]. We found that clinical airway obstruction was present in 6.8 percent of subjects; however, given the different cohorts in these various studies, it is challenging to make direct pre-HAART and post-HAART prevalence comparisons. A recent study of HIV-infected veterans in the HAART era reported that approximately 10 percent carried a diagnosis of COPD based on ICD-9 codes [19], but direct measurements of spirometry have not previously been performed in subjects receiving HAART. Risk factors for decreased FEV<sub>1</sub>/FVC in our cohort were

generally consistent with pre-HAART risk factors and included age, smoking pack-year history, and prior bacterial pneumonia [7,11]. Although a history of PCP has also been associated with obstruction [11], we did not find this relationship, possibly secondary to lack of power or inaccuracy in diagnosis of PCP.

Most notably, we found that HAART use was associated with a decreased FEV<sub>1</sub>/FVC after controlling for other independent risk factors such as age, cigarette smoking, intravenous drug use, and previous pneumonia. Although absolute differences in FEV<sub>1</sub>/FVC were small in subjects receiving HAART, these subjects were young and face a lifetime of antiretroviral treatment. Therefore, they may be at risk of developing clinically significant disease as they age.

Airway obstruction may be the latest in a series of chronic conditions linked to HAART. Prolonged HIV infection and HAART have been associated with cardiovascular disease, metabolic syndrome, osteoporosis, rheumatologic disorders, and thyroid disease [20,21]. The mechanistic link between HAART and airway obstruction is not known, but potential explanations include direct effects of HAART in the lung, restoration of the immune system allowing for renewed response to subclinical infections, and/or the development of autoimmunity.

HAART-associated cardiovascular disease, metabolic syndrome, and osteoporosis may be directly related to particular antiretroviral agents, particularly protease inhibitors [22,23], but there are no published reports of HAART medications linked to airway obstruction. We did not see a statistically significant association between protease inhibitors and obstruction, but we might have lacked sufficient power to detect this relationship. Further research is warranted to investigate the direct pulmonary effects of HAART.

HAART might also potentiate airway obstruction through indirect mechanisms such as aberrant immune restoration. IRIS is a well-documented side-effect of HAART initiation that occurs in response to known or occult pathogens [4]. Individuals placed on HAART may experience symptoms such as fever, worsening lung infiltrates, and lymphadenopathy [4,24]. These symptoms likely result from release of memory CD4<sup>+</sup> T-cells occurring weeks to months after HAART initiation. We propose that there may be a "modified" IRIS that, while not resulting in overt respiratory disease, stimulates pulmonary inflammation in response to occult or colonizing pathogens and subsequently results in airway obstruction.

In the non-HIV-infected population, the vicious circle hypothesis has been proposed as one mechanism leading to COPD [25]. This theory postulates that continued inflammation in response to microorganisms perpetuates lung damage and COPD. Bacterial pathogens such as *Streptococcus pneumoniae* and *Haemophilus influenzae*, and viral pathogens such as adenovirus, have been implicated in COPD pathogenesis [26,27]. *Pneumocystis jirovecii* colonization has also been linked to COPD in the non-HIV-infected population and has been found using polymerase chain reaction in as many as 70 percent of HIV-infected individuals without acute *Pneumocystis pneumonia* [28,29]. One of these organisms or HIV itself could act, with a persistent, but low organism burden, as a nidus of chronic inflammation in the context of improved immune function after starting HAART.

Another possible explanation of the association of HAART and airway obstruction, which does not necessarily exclude a role for infections, is that an autoimmune response develops after initiating HAART. Organ-specific autoimmunity has been demonstrated as a complication of HAART and occurs later than infection-associated IRIS [5,30]. Conditions such as autoimmune thyroid disease, sarcoidosis, autoimmune hepatitis, and arthritis have been noted after beginning HAART [20,21,30,31,32]. Detectable anti-thyroid antibodies appear after HAART initiation, and clinical

thyroid disease is associated with a lower pre-HAART CD4 cell count [20,21]. The proposed mechanism of autoimmunity during immune restoration involves release of naïve T-cells and generally occurs more than six months after HAART initiation. Autoreactive T-cells are subsequently more likely to be activated in the setting of infections, thymic dysfunction, or altered cytokine profiles associated with HIV infection and HAART [20,33,34,35]. It has also been postulated that production of T-regulatory cells is impaired in HIV-infected subjects during HAART and might lead to decreased ability to suppress autoimmunity [20,36]. Others have shown that numbers of mucosal T-regulatory cells decrease with HAART initiation [37], and it is possible that similar changes occur in the lungs resulting in decreased ability to suppress the autoimmune response.

Autoimmunity, either in response to infectious agents or other triggers, has been linked to COPD in the non-HIV-infected population [38,39,40]. Agusti proposed that an acquired immune response to self-epitopes was an important contributor to the inflammation and pulmonary damage seen in COPD [38]. Recent studies have shown that non-HIV-infected COPD patients have increased anti-elastin and anti-epithelial antibodies [39,40]. The susceptibility of HIV-infected patients on HAART to developing autoimmunity in the setting of immune restoration, combined with the findings supporting an autoimmune pathogenesis in COPD, indicate that autoimmune mechanisms may also be involved in HIV-related COPD.

### Limitations

There are several limitations of our study. First, it was a cross-sectional observational study of HIV-infected individuals; thus limiting our ability to determine causation. Use of chart review for assessing certain clinical variables is also difficult. We were unable to assess effects of HAART on progression of airway obstruction or to determine effects of length of HAART use, HAART compliance, or nadir CD4 cell count, as this information was not reliably available. Use of plasma HIV viral levels as surrogate markers of adherence is also difficult, but HAART users did have lower HIV viral levels than those not receiving HAART, suggesting that at least some subjects were compliant with HAART. It also did not appear that length of HIV infection was associated with airway obstruction, but this information is difficult to obtain accurately. In addition, pulmonary testing was limited to pre-bronchodilator spirometry. Subjects with a history of asthma were excluded, but we cannot rule out the possibility that some subjects had asthma. Airway hyperresponsiveness was previously reported in HIV-infected subjects, although not at a significantly higher prevalence than in controls and it was more common in those with a self-reported history of asthma, a group

excluded from our study [41]. We were not able to examine the association of HAART and diffusing capacity for carbon monoxide or anatomic emphysema as demonstrated on computed tomography. Thus, we might have underestimated the association of HAART and pulmonary disease. Nonetheless, the finding that HAART is associated with airway obstruction is important whether it represents asthma or COPD, and future studies are needed to determine the exact phenotype associated with HIV and HAART use. Finally, there might be unmeasured variables associated with HAART use and airway obstruction that were not considered in our model; however, we included most previously reported variables associated with obstruction and, in fact, HAART users were actually less likely to smoke, yet had more obstruction.

As this study was performed at a single center, results may not be able to be generalized to all populations of HIV-infected patients. Subjects were from an urban area, and populations in different settings or different geographic locations might not be similar to the one reported here. Inclusion of relatively healthy subjects who attended an outpatient clinic may have also biased results in finding a lower prevalence of respiratory symptoms and pulmonary function deficits than would be found in a cohort with more advanced disease or in those who do not seek primary care.

This study is the first prospective examination of airway obstruction and risk factors in HIV-infected persons during the HAART era. While most risk factors for airway obstruction were similar to those seen in the pre-HAART era, we found a novel, independent association of HAART and airway obstruction. Although the effect of HAART was small, the subjects in our study were young and the mild changes identified here could become clinically important over a lifetime of antiretroviral therapy. Future studies are needed to improve understanding of the relationship of HAART and pulmonary abnormalities, to determine progression of abnormalities over time, and to discover the mechanism of this association in order to provide treatment or prevention.

### Acknowledgments

The authors thank Steven Duncan, MD for critical review of the manuscript and James E. Bost, MS, PhD, for statistical assistance.

### Author Contributions

Conceived and designed the experiments: LH AM. Performed the experiments: MK AM. Analyzed the data: MPG LH AM. Contributed reagents/materials/analysis tools: LH FS AM. Wrote the paper: MPG AM.

### References

1. Palella FJ Jr., Delaney KM, Moorman AC, Loveless MO, Fuhrer J, et al. (1998) Declining morbidity and mortality among patients with advanced human immunodeficiency virus infection. HIV Outpatient Study Investigators. *N Engl J Med* 338: 853–860.
2. Friis-Moller N, Weber R, Reiss P, Thiebaut R, Kirk O, et al. (2003) Cardiovascular disease risk factors in HIV patients—association with antiretroviral therapy. Results from the DAD study. *AIDS* 17: 1179–1193.
3. Brown TT, Cole SR, Li X, Kingsley LA, Palella FJ, et al. (2005) Antiretroviral therapy and the prevalence and incidence of diabetes mellitus in the multicenter AIDS cohort study. *Arch Intern Med* 165: 1179–1184.
4. Lipman M, Breen R (2006) Immune reconstitution inflammatory syndrome in HIV. *Curr Opin Infect Dis* 19: 20–25.
5. Zandman-Goddard G, Shoenfeld Y (2002) HIV and autoimmunity. *Autoimmun Rev* 1: 329–337.
6. Diaz PT, Wewers MD, Pacht E, Drake J, Nagaraja HN, et al. (2003) Respiratory symptoms among HIV-seropositive individuals. *Chest* 123: 1977–1982.
7. Diaz PT, King MA, Pacht ER, Wewers MD, Gadek JE, et al. (2000) Increased susceptibility to pulmonary emphysema among HIV-seropositive smokers. *Ann Intern Med* 132: 369–372.
8. Rosen MJ, Lou Y, Kvale PA, Rao AV, Jordan MC, et al. (1995) Pulmonary function tests in HIV-infected patients without AIDS. Pulmonary Complications of HIV Infection Study Group. *Am J Respir Crit Care Med* 152: 738–745.
9. Crothers K (2007) Chronic obstructive pulmonary disease in patients who have HIV infection. *Clin Chest Med* 28: 575–587.
10. Mitchell DM, Fleming J, Pinching AJ, Harris JR, Moss FM, et al. (1992) Pulmonary function in human immunodeficiency virus infection. A prospective 18-month study of serial lung function in 474 patients. *Am Rev Respir Dis* 146: 745–751.
11. Morris AM, Huang L, Bacchetti P, Turner J, Hopewell PC, et al. (2000) Permanent declines in pulmonary function following pneumonia in human immunodeficiency virus-infected persons. The Pulmonary Complications of HIV Infection Study Group. *Am J Respir Crit Care Med* 162: 612–616.
12. Miller MR, Hankinson J, Brusasco V, Burgos F, Casaburi R, et al. (2005) Standardisation of spirometry. *Eur Respir J* 26: 319–338.
13. Knudson RJ, Lebowitz MD, Holberg CJ, Burrows B (1983) Changes in the normal maximal expiratory flow-volume curve with growth and aging. *Am Rev Respir Dis* 127: 725–734.
14. Hosmer DW, Hosmer T, Le Cessie S, Lemeshow S (1997) A comparison of goodness-of-fit tests for the logistic regression model. *Stat Med* 16: 965–980.

15. Pauwels RA, Buist AS, Calverley PMA, Jenkins CR, Hurd SS (2001) Global Strategy for the Diagnosis, Management, and Prevention of Chronic Obstructive Pulmonary Disease. NHLBI/WHO Global Initiative for Chronic Obstructive Lung Disease (GOLD) Workshop Summary. *Am J Respir Crit Care Med* 163: 1256–1276.
16. Baron RM, Kenny DA (1986) The moderator-mediator variable distinction in social psychological research: conceptual, strategic, and statistical considerations. *J Pers Soc Psychol* 51: 1173–1182.
17. Wallace JM, Hansen NI, Lavange L, Glassroth J, Browdy BL, et al. (1997) Respiratory disease trends in the Pulmonary Complications of HIV Infection Study cohort. Pulmonary Complications of HIV Infection Study Group. *Am J Respir Crit Care Med* 155: 72–80.
18. Diaz PT, King MA, Pacht ER, Wewers MD, Gadek JE, et al. (1999) The pathophysiology of pulmonary diffusion impairment in human immunodeficiency virus infection. *Am J Respir Crit Care Med* 160: 272–277.
19. Crothers K, Butt AA, Gibert CL, Rodriguez-Barradas MC, Crystal S, et al. (2006) Increased COPD among HIV-positive compared to HIV-negative veterans. *Chest* 130: 1326–1333.
20. Chen F, Day SL, Metcalfe RA, Sethi G, Kapembwa MS, et al. (2005) Characteristics of autoimmune thyroid disease occurring as a late complication of immune reconstitution in patients with advanced human immunodeficiency virus (HIV) disease. *Medicine* 84: 98–106.
21. Jubault V, Penformis A, Schillo F, Hoen B, Izembart M, et al. (2000) Sequential occurrence of thyroid autoantibodies and Graves' disease after immune restoration in severely immunocompromised human immunodeficiency virus-1-infected patients. *J Clin Endocrinol Metab* 85: 4254–4257.
22. Koppel K, Bratt G, Schulman S, Bylund H, Sandstrom E (2002) Hypofibrinolytic state in HIV-1-infected patients treated with protease inhibitor-containing highly active antiretroviral therapy. *J Acquir Immune Defic Syndr* 29: 441–449.
23. Mondal D, Pradhan L, Ali M, Agrawal KC (2004) HAART drugs induce oxidative stress in human endothelial cells and increase endothelial recruitment of mononuclear cells: exacerbation by inflammatory cytokines and amelioration by antioxidants. *Cardiovasc Toxicol* 4: 287–302.
24. Shelburne SA, Visnegarwala F, Darcourt J, Graviss EA, Giordano TP, et al. (2005) Incidence and risk factors for immune reconstitution inflammatory syndrome during highly active antiretroviral therapy. *AIDS* 19: 399–406.
25. Sethi S (2000) Bacterial infection and the pathogenesis of COPD. *Chest* 117: 286S–291S.
26. Sethi S (2004) Bacteria in exacerbations of chronic obstructive pulmonary disease: phenomenon or epiphenomenon? *Proc Am Thorac Soc* 1: 109–114.
27. Retamales I, Elliott WM, Meshi B, Coxson HO, Pare PD, et al. (2001) Amplification of inflammation in emphysema and its association with latent adenoviral infection. *Am J Respir Crit Care Med* 164: 469–473.
28. Morris A, Sciurba FC, Lebedeva IP, Githaiga A, Elliott WM, et al. (2004) Association of chronic obstructive pulmonary disease severity and *Pneumocystis* colonization. *Am J Respir Crit Care Med* 170: 408–413.
29. Huang L, Crothers K, Morris A, Groner G, Fox M, et al. (2003) *Pneumocystis* colonization in HIV-infected patients. *J Eukaryot Microbiol* 50 Suppl: 616–617.
30. Calabrese LH, Kirchner E, Shrestha R (2005) Rheumatic complications of human immunodeficiency virus infection in the era of highly active antiretroviral therapy: emergence of a new syndrome of immune reconstitution and changing patterns of disease. *Semin Arthritis Rheum* 35: 166–174.
31. Morris DG, Jasmer RM, Huang L, Gotway MB, Nishimura S, et al. (2003) Sarcoidosis following HIV infection: evidence for CD4+ lymphocyte dependence. *Chest* 124: 929–935.
32. O'Leary JG, Zachary K, Misdraji J, Chung RT (2008) *De novo* autoimmune hepatitis during immune reconstitution in an HIV-infected patient receiving highly active antiretroviral therapy. *Clin Infect Dis* 46: e12–14.
33. Douek DC, McFarland RD, Keiser PH, Gage EA, Massey JM, et al. (1998) Changes in thymic function with age and during the treatment of HIV infection. *Nature* 396: 690–695.
34. Ermann J, Fathman CG (2001) Autoimmune diseases: genes, bugs and failed regulation. *Nat Immunol* 2: 759–761.
35. Imami N, Antonopoulos C, Hardy GA, Gazzard B, Gotch FM (1999) Assessment of type 1 and type 2 cytokines in HIV type 1-infected individuals: impact of highly active antiretroviral therapy. *AIDS Res Hum Retroviruses* 15: 1499–1508.
36. de St Groth BF, Landay AL (2008) Regulatory T cells in HIV infection: pathogenic or protective participants in the immune response? *AIDS* 22: 671–683.
37. Epple HJ, Loddenkemper C, Kunkel D, Troger H, Maul J, et al. (2006) Mucosal but not peripheral FOXP3+ regulatory T cells are highly increased in untreated HIV infection and normalize after suppressive HAART. *Blood* 108: 3072–3078.
38. Agusti A, MacNee W, Donaldson K, Cosio M (2003) Hypothesis: does COPD have an autoimmune component? *Thorax* 58: 832–834.
39. Lee SH, Goswami S, Grudo A, Song LZ, Bandi V, et al. (2007) Antielastin autoimmunity in tobacco smoking-induced emphysema. *Nat Med* 13: 567–569.
40. Feghali-Bostwick CA, Gadgil AS, Otterbein LE, Pilewski JM, Stoner MW, et al. (2008) Autoantibodies in patients with chronic obstructive pulmonary disease. *Am J Respir Crit Care Med* 177: 156–163.
41. Wallace JM, Stone GS, Browdy BL, Tashkin DP, Hopewell PC, et al. (1997) Nonspecific airway hyperresponsiveness in HIV disease. Pulmonary Complications of HIV Infection Study Group. *Chest* 111: 121–127.
